**Genome-wide DNA methylation and gene expression patterns reflect genetic ancestry and environmental differences across the Indonesian archipelago**

Heini Natri<sup>1,2,\*</sup>, Katalina S. Bobowik<sup>3,4,5,\*</sup>, Pradiptajati Kusuma<sup>6,7</sup>, Chelzie Crenna Darusallam<sup>6</sup>, Guy S. Jacobs<sup>7</sup>, Georgi Hudjashov<sup>8</sup>, J. Stephen Lansing<sup>9,10,11</sup>, Herawati Sudoyo<sup>6,12,13</sup>, Nicholas E. Banovich<sup>2,\*\*</sup>, Murray P. Cox<sup>8,\*\*</sup>, Irene Gallego Romero<sup>3,4,5,\*\*</sup>

<sup>1</sup> Center for Evolution and Medicine, School of Life Sciences, Arizona State University, Tempe 85281, AZ, USA

<sup>2</sup> The Translational Genomics Research Institute, Phoenix 85004, AZ, USA

<sup>3</sup> Melbourne Integrative Genomics, University of Melbourne, Parkville 3010, Australia

<sup>4</sup> School of BioSciences, University of Melbourne, Parkville 3010, Australia

<sup>5</sup> Centre for Stem Cell Systems, University of Melbourne, Parkville 3010, Australia

<sup>6</sup> Genome Diversity and Diseases Laboratory, Eijkman Institute for Molecular Biology, Jakarta 10430, Indonesia

<sup>7</sup> Complexity Institute, Nanyang Technological University, Singapore 637723, Singapore

<sup>8</sup> Statistics and Bioinformatics Group, School of Fundamental Sciences, Massey University, Palmerston North 4410, New Zealand

<sup>9</sup> Santa Fe Institute, Santa Fe, NM 87501, USA

<sup>10</sup> Vienna Complexity Science Hub, Vienna 1080, Austria

<sup>11</sup> Stockholm Resilience Center, Kräftriket, Stockholm 10405, Sweden

<sup>12</sup> Department of Medical Biology, Faculty of Medicine, University of Indonesia, Jakarta 10430, Indonesia

<sup>13</sup> Sydney Medical School, University of Sydney, Sydney, NSW 2006, Australia

Contact information:

NEB: [nbanovich@tgen.org](mailto:nbanovich@tgen.org)

MPC: [m.p.cox@massey.ac.nz](mailto:m.p.cox@massey.ac.nz)

IRG: [irene.gallego@unimelb.edu.au](mailto:irene.gallego@unimelb.edu.au)

\* These authors contributed equally to this work

\*\* These authors equally led this work

## 34 Abstract:

35 Indonesia is the world's fourth most populous country, host to striking levels of human diversity, regional  
36 patterns of admixture, and varying degrees of introgression from both Neanderthals and Denisovans.  
37 However, it has been largely excluded from the human genomics sequencing boom of the last decade.  
38 To serve as a benchmark dataset of molecular phenotypes across the region, we generated genome-wide  
39 CpG methylation and gene expression measurements in over 100 individuals from three locations that  
40 capture the major genomic and geographical axes of diversity across the Indonesian archipelago.  
41 Investigating between- and within-island differences, we find up to 10% of tested genes are differentially  
42 expressed between the islands of Mentawai (Sumatra) and New Guinea. Variation in gene expression is  
43 closely associated with DNA methylation, with expression levels of 9.7% of genes strongly correlating  
44 with nearby CpG methylation, and many of these genes being differentially expressed between islands.  
45 Genes identified in our differential expression and methylation analyses are enriched in pathways  
46 involved in immunity, highlighting Indonesia tropical role as a source of infectious disease diversity and  
47 the strong selective pressures these diseases have exerted on humans. Finally, we identify robust within-  
48 island variation in DNA methylation and gene expression, likely driven by very local environmental  
49 differences across sampling sites. Together, these results strongly suggest complex relationships between  
50 DNA methylation, transcription, archaic hominin introgression and immunity, all jointly shaped by the  
51 environment. This has implications for the application of genomic medicine, both in critically  
52 understudied Indonesia and globally, and will allow a better understanding of the interacting roles of  
53 genomic and environmental factors shaping molecular and complex phenotypes.

54

55 **Keywords:** Indonesia, RNA-sequencing, DNA methylation, gene expression, molecular phenotypes

56

57

58

59

60

## 61 Introduction

62 Modern human genomics does not equitably represent the full breadth of humanity. While genome  
63 sequences for people of European descent now number a million or more, most of the world is deeply  
64 understudied<sup>1</sup>. This is particularly true of Indonesia<sup>2</sup>, a country geographically as large as continental  
65 Europe and the world's fourth largest by population. Genomic diversity in Indonesia is strikingly  
66 different to other well-characterized East Asian populations, such as Han Chinese and Japanese, but this  
67 diversity is not captured in large global datasets like the 1000 Genomes Project<sup>3</sup> or the Simons Genome  
68 Diversity Project<sup>4</sup>. The first Indonesian genome sequences were only reported in 2016<sup>5</sup> with the first  
69 representative survey of diversity across the archipelago only appearing in 2019<sup>6</sup>. This extreme lack of  
70 representation extends to molecular phenotypes. To our knowledge, only one genome-wide gene  
71 expression study has been published<sup>7</sup> from the region, focused exclusively on host-pathogen interactions  
72 with *P. falciparum*. There are no analyses of diversity in gene regulatory mechanisms in either Indonesia  
73 or, more broadly, Island Southeast Asia.

74  
75 This gap is especially incongruous because Indonesia is an epicenter of infectious disease diversity,  
76 ranging from well-known agents like malaria<sup>8</sup> to emerging diseases like zika virus<sup>9</sup>. The country faces  
77 substantial healthcare challenges, including the rise in prevalence of understudied tropical infectious  
78 diseases and the increasing impact of metabolic disorders among a growing middle class<sup>10</sup>. However,  
79 Indonesia also offers unique advantages for studying responses to these diseases and disorders, some of  
80 which are likely to have exerted strong evolutionary pressures on the immune system over thousands of  
81 years<sup>11</sup>. Because the country comprises a chain of islands that stretch for 50 degrees of longitude along  
82 the equator (wider than either the continental USA or mainland Europe), but span barely 15 degrees of  
83 latitude, environment conditions are broadly comparable in many key respects across Indonesia. In  
84 contrast, a complex population history means that its people differ greatly, forming a genomic cline from  
85 Asian ancestry in the west to Papuan ancestry in the east<sup>12</sup>. This change in ancestry is the most distinctive  
86 genomic signal observed in the region<sup>13</sup>, and provides a framework for studying the effects of genome  
87 composition on gene expression in a heterogeneous environment.

88  
89 To provide a benchmark dataset of regional molecular phenotypes, here we report genome-wide  
90 measurements of DNA methylation and gene expression for 117 individuals drawn from three population  
91 groups that capture the major genomic and geographical axes of diversity across Indonesia. The people  
92 of Mentawai, living on the barrier islands off Sumatra, are representative of the dominant Asian ancestry

93 in western Indonesia<sup>13</sup>; the Korowai, hunter-gatherers from the highlands of western New Guinea capture  
94 key aspects of regional Papuan ancestry<sup>6</sup>; and the inhabitants of Sumba in eastern Indonesia are,  
95 genetically, a near equal mixture of the two different ancestries<sup>14</sup>. However, it remains unclear whether,  
96 and to what extent, these differences in genomic ancestry correlate with variation in molecular  
97 phenotypes. By quantifying DNA methylation and gene expression levels across Indonesia for the first  
98 time, we identify the relative influences of genomic ancestry versus plasticity to local environmental  
99 conditions in driving regional molecular phenotypic patterns.

100

101

## 102 Methods

### 103 Ethical approvals

104 The samples used in this study were collected by JSL, HS and an Indonesian team from the Eijkman  
105 Institute for Molecular Biology, Jakarta, Indonesia, with the assistance of Indonesian Public Health clinic  
106 staff. All collections followed protocols for the protection of human subjects established by institutional  
107 review boards at the Eijkman Institute (EIREC #90 and EIREC #126) and the University of Melbourne  
108 (Human Ethics Sub-Committee approval 1851639.1). All individuals gave written informed consent for  
109 participation in the study. Permission to conduct research in Indonesia was granted by the Indonesian  
110 Institute of Sciences and by the Ministry for Research, Technology and Higher Education.

111

### 112 Data collection

113 Whole blood was collected by trained phlebotomists from the Eijkman Institute from over 300  
114 Indonesian men. Samples were collected across multiple villages in the three islands using EDTA blood  
115 tubes from either Vacuette or Intherma for DNA isolation, and Tempus Blood RNA Tubes (Applied  
116 Biosystems) for RNA isolation. All RNA extractions were performed according to the manufacturers'  
117 protocols and randomised with respect to village and island (Supplementary Tables 1 and 2).

118

119 Quality and concentration of all extracted RNA samples were assessed with a Bioanalyzer 2100 (Agilent)  
120 and a Qubit device (Life Technologies), respectively. We selected 117 samples for RNA sequencing and  
121 DNA methylation analysis primarily on the basis of RIN score, by focusing on villages with at least 10  
122 samples with  $RIN \geq 6$  (Table 1). Given our past work on the island of Sumba<sup>14</sup>, we included all samples  
123 from Sumba with  $RIN \geq 6$ , heedless of village. However, we occasionally observed differences between  
124 our RIN measurements and those performed by the sequencing provider, with the latter generally being  
125 lower. Out of 117 individuals, 24 (21%) had a final RIN measurement  $< 6$ . Further detail on all samples,  
126 including extracting and sequencing batches, is provided in Supplementary Tables 1 and 2. Library  
127 preparation was performed by MacroGen (South Korea), using 750 ng of RNA and the Globin-Zero Gold  
128 rRNA Removal Kit (Illumina) according to the manufacturer's instructions. Samples were sequenced  
129 using a 100-bp paired-end configuration on an Illumina HiSeq 2500 to an average depth of 30 million  
130 read pairs per individual, in three batches. All batches included at least one inter-batch control for  
131 downstream normalisation (Supplementary Tables 1 and 2).

132

133 In parallel, we extracted whole blood DNA from all individuals included in the RNA sequencing data  
 134 using Gentra® Puregene® for human whole blood kit (QIAGEN) and MagAttract® HMW DNA kit  
 135 (QIAGEN) according to the manufacturer's instructions. 1 µg of DNA from each sample was shipped to  
 136 Macrogen, bisulfite-converted and hybridized to Illumina Infinium EPIC BeadChips according to the  
 137 manufacturer's instructions. Samples were randomized with respect to village and island across two array  
 138 batches, with three samples processed on both batches to control for technical variation (Supplementary  
 139 Table 1).

140

141 Table 1: Numbers of DNA methylation and RNA sequenced samples from each study location.

142

| Island     | Village          | Location             | DNA methylation | RNA-seq | RNA-seq samples RIN ≥ 6 |
|------------|------------------|----------------------|-----------------|---------|-------------------------|
| Mentawai   | Madobag          | 1.594° S, 99.084° E  | 17              | 17      | 15                      |
|            | Taileleu         | 1.788° S, 99.137° E  | 31              | 31      | 31                      |
|            | <i>Subtotal</i>  |                      | 48              | 48      | 46                      |
| Sumba      | Anakalang        | 9.588° S, 119.575° E | 17              | 17      | 15                      |
|            | Bukambero        | 9.450° S, 119.104° E | 1               | 1       | 0                       |
|            | Hupu Mada        | 9.697° S, 119.464° E | 5               | 5       | 0                       |
|            | Padira Tana      | 9.671° S, 119.832° E | 3               | 3       | 2                       |
|            | Patiala Bawa     | 9.751° S, 119.332° E | 1               | 1       | 0                       |
|            | Rindi            | 9.935° S, 120.669° E | 5               | 5       | 2                       |
|            | Wunga            | 9.385° S, 119.958° E | 16              | 16      | 12                      |
|            | Wura Homba       | 9.560° S, 118.959° E | 1               | 1       | 0                       |
|            | <i>Subtotal</i>  |                      | 49              | 49      | 39                      |
| West Papua | Basman (Korowai) | 5.480° S, 139.673° E | 20              | 20      | 16                      |
|            | <i>Subtotal</i>  |                      | 20              | 20      | 16                      |
| Total      |                  |                      | 117             | 117     | 93                      |

143

## 144 **RNA sequencing data processing**

145 All RNA sequencing reads were examined with FastQC v. 0.11.5<sup>15</sup>. Leading and trailing bases below a  
146 Phred score of 20 were removed using Trimmomatic v. 0.36<sup>16</sup>. Reads were then aligned to the human  
147 genome (GRCh38 Ensembl release 90: August 2017) with STAR v. 2.5.3a<sup>17</sup> and a two-pass alignment  
148 mode; this resulted in a mean of ~29 million uniquely-mapped read pairs per sample. Next, we performed  
149 read quantification with featureCounts v. 1.5.3<sup>18</sup> against a subset of GENCODE basic (release 27)  
150 annotations that included only transcripts with support levels 1-3, retaining a total of 58,391 transcripts  
151 across 29,614 genes. On average, we successfully assigned ~15 million read pairs to each sample  
152 (Supplementary table 2).

153

## 154 **Differential expression analysis**

155 All statistical analyses were performed using R v. 3.5.2<sup>19</sup>. We transformed read counts to log<sub>2</sub>-counts per  
156 million (CPM) using a prior count of 0.25, and removed genes with low expression levels by only keeping  
157 genes with log<sub>2</sub> CPM  $\geq 1$  in at least half of the individuals from any island, resulting in a total of 12,975  
158 genes retained for further analysis. To quantify the effect of technical batch, we included six replicate  
159 samples among our sequencing batches. As expected, PCA of uncorrected data suggested the presence  
160 of substantial sequencing batch effects in the data (Supplementary figure 1). However, pairwise  
161 correlations between technical replicates were higher than between different individuals from the same  
162 village sequenced in the same batch (Supplementary figure 2).

163

164 We applied TMM normalisation<sup>20</sup> to the data, and removed high sample variability from the count data  
165 using the *voom* function<sup>21</sup> in limma v. 3.40.2<sup>22</sup>. Differential expression testing was also performed using  
166 limma. To construct the linear model for testing, we used ANOVA to test for associations between all  
167 possible covariates and the first 10 principal components (PC) of the data. Technical covariates  
168 significantly associated with at least one PC (sequencing batch, RIN, age) were included in the model.  
169 In addition, because blood cell type composition can impact gene expression estimates in bulk RNA  
170 samples, we used DeconCell v. 0.1.0<sup>23</sup> to estimate the proportion of CD8T, CD4T, NK, B cells,  
171 monocytes and granulocytes in each sample (Supplementary table 2), and tested these for association  
172 with the first 10 PCs as described above. All covariates were significantly associated with at least one  
173 PC and were included in the differential expression model. Sampling sites were included at either the  
174 island or the village level, depending on the test. Comparisons between villages were limited to those  
175 with at least 15 individuals, to ensure sufficient power to detect differences. All individuals were included

176 in comparisons between islands, and models were not hierarchically structured. Genes were called as  
177 differentially expressed (DEG) if the FDR-adjusted  $p$  value was below 0.01, regardless of the magnitude  
178 of the  $\log_2$  fold change, unless noted otherwise.

179

180 Lists of DEGs were annotated using biomaRt v. 2.40.0<sup>24</sup>. Gene set enrichment analyses for the DEGs on  
181 the island and village levels were performed using clusterProfiler v. 3.12.0<sup>25</sup>, with Gene Ontology and  
182 KEGG annotation drawn from the org.Hs.eg.db v. 3.9 database<sup>26</sup>. Additionally, we tested whether DEGs  
183 were enriched for genes known to have been introgressed from Denisovans into individuals of Papuan  
184 ancestry at high frequency using a hypergeometric test. A GO term similarity test was performed using  
185 GOSim v. 1.22.0<sup>27</sup> using the ‘relevance’ method. Finally, to examine possible associations between  
186 known climatic variables and expression across sampling sites, we retrieved mean monthly precipitation  
187 and temperature data from WorldClim v. 2.0<sup>28</sup> for the five main villages in our study at a resolution of  
188 0.5 arcminutes (roughly 1 km<sup>2</sup> tiles).

189

#### 190 **DNA methylation array data processing and analysis**

191 DNA methylation data were processed using minfi v. 1.30.0<sup>29</sup>. The two arrays were combined using the  
192 *combineArrays* function and preprocessed with the *bgcorrect.illumina* function to correct for array  
193 background signal. Signal strength across all probes was evaluated using the *detectionP* function and  
194 probes with signal  $p < 0.01$  in >75% of samples were retained. To avoid potential spurious signals due  
195 to differences in probe hybridization affinity, we discarded 6,072 probes overlapping known SNPs  
196 segregating in any of the study populations based on previously published genotype data<sup>6</sup>. The final  
197 number of probes retained was 859,404. Subset-quantile Within Array Normalization (SWAN) was  
198 carried out using the *preprocessSWAN* function<sup>30</sup>. Methylated and unmethylated signals were quantile  
199 normalized using lumi v. 2.36.0<sup>31</sup>. As with the RNA sequencing, replicate samples were included to  
200 detect and correct for batch effects (supplementary figure 3). The replicate samples exhibit a high  
201 correlation between batches (Spearman’s Rho 0.969 for MPI-025 and 0.980 for SMB-ANK-029,  
202 Supplementary Figure 4). As above, we used limma to test for differential methylation between sampling  
203 sites. We included methylation array batch, age, and the estimated cell type proportions (derived from  
204 the RNA sequencing data) as covariates. Differentially methylated probes (DMPs) between all pairwise  
205 comparisons of the islands and villages were identified using contrast designs. Significant DMPs were  
206 selected based on an FDR-adjusted  $p$  value threshold of 0.01 and a  $\log_2$  fold change of 0.5 or greater.  
207 Enrichment tests for the DMPs were performed using missMethyl v. 1.18.0<sup>32</sup>, to account for differences



208 in probe density associated with gene length that can otherwise bias results<sup>33</sup>; probes were annotated to  
209 genes according to Illumina's manifest for the EPIC array.

210

211 We further identified differentially methylated regions (DMRs) by annotating the CpG probes with the  
212 *cpg.annotate* function of the R package DMRcate v. 3.9<sup>34</sup>, and by collapsing the probes to regions using  
213 the *dmrcate* function. Individual probes with an FDR-adjusted  $p$  value  $\leq 0.01$  and significant DMRs were  
214 selected based on a region beta value of 0.5 or greater.

215

## 216 **Principal Component Analysis (PCA)**

217 DNA methylation M-values and gene expression  $\log_2$  CPM values were adjusted to correct for batch  
218 effects and differences in blood cell type proportions between samples by fitting a linear model with the  
219 technical covariates used in the differential methylation and expression analysis. Residuals of this model  
220 were used in the PCAs in Figure 1. Variable CpG probes and genes were identified based on coefficients  
221 of variation between samples. PCA was performed using the  $10^4$  most variable probes and the  $10^3$  most  
222 variable genes from the methylation and expression datasets, respectively; PCAs of the entire data set  
223 before and after batch correction are available in supplementary figures 1 and 3.

224

## 225 **Identifying associations between DNA methylation regions and gene expression**

226 We used the R package MethylMix v. 2.12.0<sup>35,36</sup> to identify transcriptionally predictive methylation  
227 states by focusing on methylation changes that affect gene expression. As with the PCA analysis, DNA  
228 methylation M-values and gene expression  $\log$  (CPM) values were adjusted to account for technical  
229 covariates and blood cell type proportions by fitting a linear model. Residuals of these linear models  
230 were used in the analysis. Batch corrected M-values and  $\log$ CPM values were min-max normalized to  
231 range from 0 to 1. CpG probe methylation levels were matched to genes using the *ClusterProbes*  
232 function, which uses a complete linkage hierarchical clustering algorithm for all probes of a single gene  
233 to cluster the probes. To identify transcriptionally predictive DNA methylation events, MethylMix  
234 utilizes linear regression to detect negative correlations between methylation and gene expression levels.  
235 Matching DNA methylation and gene expression data from 117 individuals were used in the analysis,  
236 and a total of 10,420 genes with matching methylation and expression data were tested. As MethylMix  
237 does not output detailed summary statistics of the fitted linear models, we used linear regression to  
238 calculate the  $r^2$  and  $p$  values for each significant CpG probe cluster and gene pair detected by MethylMix.  
239 False discovery rate adjusted  $p$  values were calculated using the *p.adjust* function in base R.

240

241 **Data access**

242 All RNA sequencing reads and Illumina Epic iDat files are available through the Data Access Committee  
243 of the official data repository at the European Genome-phenome Archive (EGA;  
244 <https://www.ebi.ac.uk/ega/home>). The RNA sequencing data are deposited in study EGAS00001003671  
245 and the methylation data are deposited in study EGAS00001003653. Matrices of unfiltered read counts  
246 (doi:10.26188/5d12023f77da8) and M-values (doi:10.26188/5d13fb401e305) for all samples, including  
247 replicates, are freely available on figshare (<https://figshare.com>). Differential expression  
248 (doi:10.26188/5d26aec1d817a) and methylation (10.26188/5d26b0b5230dd) testing results are freely  
249 available on figshare.

250

251

## 252 Results

### 253 Differential DNA methylation and gene expression between Indonesian island populations

254 To quantify the gene regulatory landscape in Indonesia, we generated DNA methylation (array) and gene  
255 expression (RNA sequencing) measurements from 117 whole blood samples of male individuals living  
256 on three islands in the Indonesian archipelago (Figure 1A). Our three sampling sites, Mentawai, Sumba,  
257 and West Papua, represent distinct points along a well-documented Asian/Papuan admixture cline<sup>13</sup>: the  
258 Korowai of West Papua exhibit high Papuan ancestry; Sumbanese have intermediate degrees of Papuan  
259 ancestry; and the Mentawai have no Papuan ancestry, having been settled primarily by ancestral

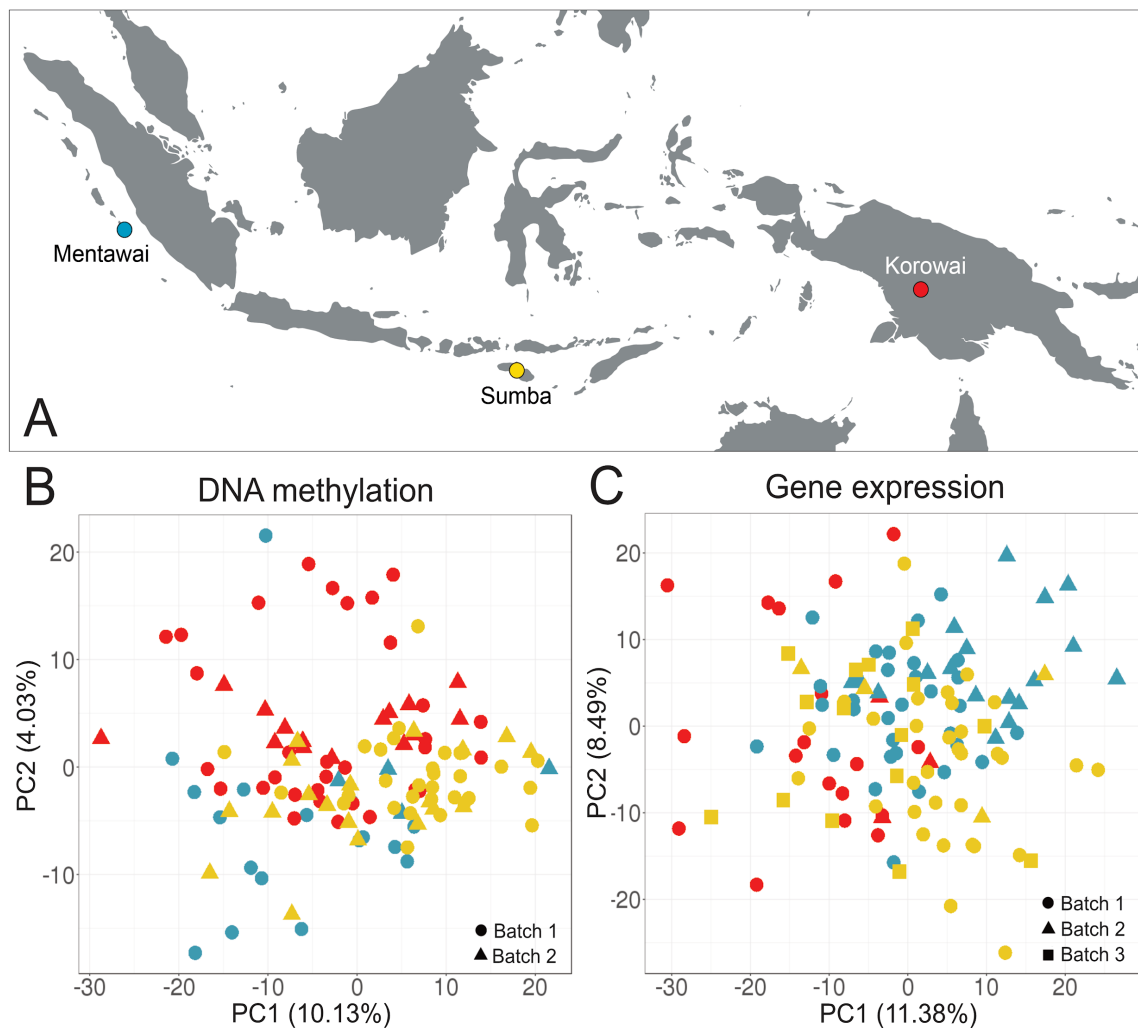

**Figure 1. Sampling locations and overview of DNA methylation and gene expression variation among the study samples.** (A) Colors indicate island populations: Mentawai, blue; Sumba, yellow; Korowai, red. PCA was performed on the top 10,000 most variable methylation probes and the top 1,000 most variable genes, determined by the sample-wide coefficient of variation. The first two axes of variation from the principal component analysis in the (B) DNA methylation and (C) gene expression data after correcting for confounding effects are driven by between-island differences. Plotting shapes indicates sequencing/array batches.

260 Austronesian speakers. Furthermore, Korowai individuals are likely to carry up to 5% of introgressed  
261 genomic sequence from archaic Denisovans, as repeatedly observed in other samples from the island of  
262 New Guinea<sup>6,37</sup>.

263

264 Principal component analysis of DNA methylation (Figure 1B) and gene expression (Figure 1C) shows  
265 clear clustering of samples driven by population origin. After correcting for known technical  
266 confounders, PC1 in the DNA methylation data separates the island of Sumba from both the Korowai  
267 (FDR-corrected ANOVA  $p = 0.001$ ) and Mentawai ( $p = 7.4 \times 10^{-5}$ ); PC2 further differentiates Sumbanese  
268 and Mentawai ( $p = 9.0 \times 10^{-4}$ ) and additionally separates Mentawai from Korowai ( $p = 9.0 \times 10^{-7}$ ). In the  
269 gene expression data, Korowai is separated from both Mentawai and Sumba ( $p = 1.0 \times 10^{-7}$  and  $1.5 \times 10^{-6}$ ,  
270 respectively), whereas PC2 separates Sumba from Mentawai ( $p = 1.6 \times 10^{-4}$ ).

271

272 We then tested for differences in DNA methylation and gene expression between the three islands,  
273 initially without considering the village structure in Sumba and Mentawai (Table 1; supplementary tables  
274 1 and 2). At an absolute  $\log_2(\text{FC})$  threshold of 0.5 and an FDR-adjusted  $p$  value threshold of 0.01, we  
275 detected 22,189 (2.58% of all tested probes), 14,168 (1.64%) and 3,947 (0.46%) differentially methylated  
276 probes (DMPs) and 1,398 (10.77% of all tested genes), 1,017 (7.84%), and 314 (2.40%) differentially  
277 expressed genes (DEGs) between Sumba and the Korowai, Mentawai and the Korowai, and Sumba and  
278 Mentawai, respectively (Figure 2A, 2B). In addition, we identified 1,003, 919 and 283 differentially  
279 methylated regions across all three inter-island comparisons, respectively, when thresholding to a mean  
280  $\beta$  difference of 0.05 across the region. A full summary of these results is available as supplementary table  
281 3.

282

283 There is substantial overlap in signals between either Sumba or Mentawai versus Korowai (Figure 2C,  
284 2D). For instance, 45.35% of DEGs between Sumba and Korowai are also differentially expressed  
285 between Mentawai and Korowai; the same is true of 42.24% of DMPs between Sumba and Korowai.  
286 DEGs and DMPs between Sumba and Mentawai, however, have poor overlap with the other inter-island  
287 comparisons, and are generally limited in number. This suggests that many of the signals we identify are  
288 driven by the Korowai data, and by some degree of homogeneity across Sumba and Mentawai. Indeed,  
289 comparisons involving Korowai routinely identify an order of magnitude more DEGs and DMPs.  
290 Furthermore, we find substantial agreement in both the magnitude and direction of effect between DEGs  
291 and DMPs across both comparisons involving Korowai, (Figure 2E, 2F; generalized additive model of  
292 the form ( $y \sim s(x, \text{bs} = \text{"cs"})$ ); methylation deviance explained by model = 64.6%,  $p < 2 \times 10^{-16}$ ), expression

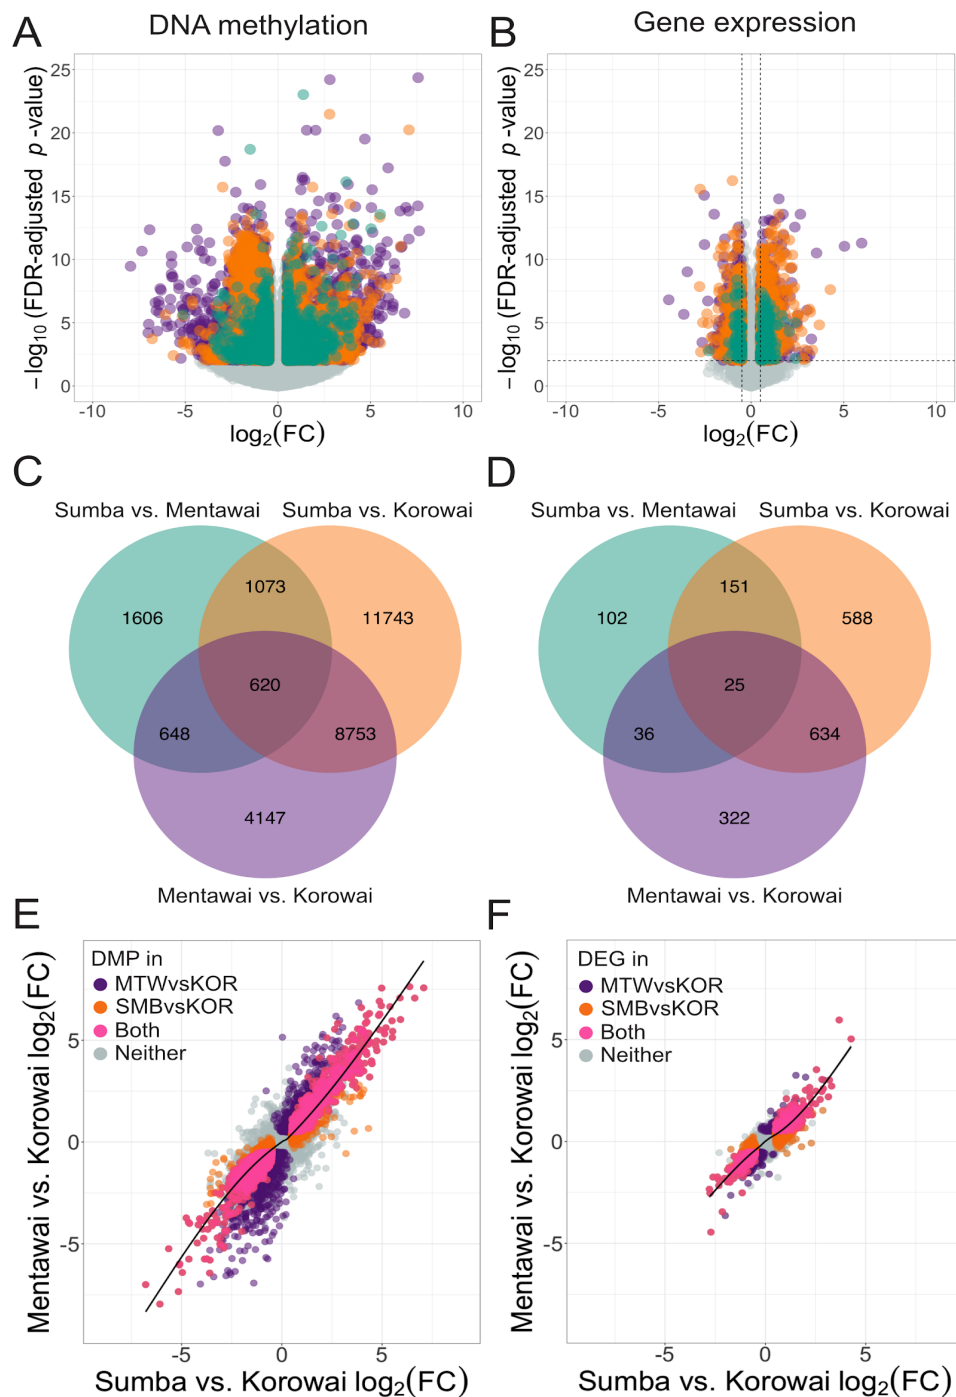

**Figure 2. Inter-island differential expression and methylation trends.** Volcano plots of (A) differentially methylated probes and (B) differentially expressed genes between Sumba and Mentawai (green), Korowai and Sumba (orange), and Korowai and Mentawai (purple). Venn diagrams of DMPs (C) and DEGs (D) overlapping between different pairwise comparisons at an FDR-adjusted *p* value ≤ 0.01 and an absolute log<sub>2</sub>(FC) ≥ 0.5. Relationship between the log<sub>2</sub>(FC) of each probe (E) and gene (F) between Mentawai vs. Korowai and Sumba vs. Korowai. Probes and genes that were DMP or DEG between Mentawai and Korowai (purple), Sumba and Korowai (orange), or both comparisons (pink) are indicated. Smoothed conditional means based on generalized additive models are presented with 95% confidence intervals.

294 featuring either Sumba or Mentawai, regardless of whether we focus on methylation or expression  
295 differences (Supplementary Figure 5).

296

### 297 **Differentially expressed genes are enriched for immune function and Denisovan introgression**

298 We tested for enrichment of DEGs and DMPs against Gene Ontology (GO<sup>38</sup>) and Kyoto Encyclopedia  
299 of Genes and Genomes (KEGG<sup>39</sup>) pathways to detect functional enrichment between island populations.  
300 Overlapping enriched GO categories and KEGG pathways (adjusted  $p \leq 0.05$ ; full tables of results for  
301 all comparisons are provided as Supplementary Tables 4-7) in comparisons between both Mentawai or  
302 Sumba versus the Korowai include functions related to the adaptive immune response, malaria response,  
303 and nervous system function (Supplementary Figure 6). However, DEGs between Mentawai and Sumba  
304 were enriched for GO terms related to neurogenesis and the nervous system with no enriched KEGG  
305 pathways. Similar testing for enrichment on DMPs shows various categories, which include terms mostly  
306 related to neurogenesis, the nervous system, and sensory perception, and which partly overlap with  
307 categories enriched in DEGs, although biological interpretation of these terms is not straightforward.

308

309 Finally, because the island of New Guinea has the highest levels of Denisovan introgression worldwide  
310 (up to 5%<sup>6</sup>), we asked whether any of the genes differentially expressed between the Korowai (high  
311 Papuan ancestry) and Mentawai (no Papuan ancestry), or the Korowai and Sumbanese (intermediate  
312 Papuan ancestry) fell within high confidence introgressed Denisovan tracts, on the basis of our previous  
313 data<sup>6</sup>. A total of 265 DEGs (considering all comparisons) overlap high confidence introgressed  
314 Denisovan haplotype blocks in New Guinea<sup>6</sup>. High-frequency introgressed genes in our DEGs includes  
315 *FAHD2B* (introgressed at 65% frequency in New Guinea; DE between Sumba and West Papua ( $p =$   
316  $0.005$ ), and Mentawai and West Papua ( $p = 8.8 \times 10^{-7}$ ), and multiple genes related to immunity and  
317 antiviral response, such as *CXCR6* (20% frequency in New Guinea<sup>40</sup>) and *GBP1/3/4* (19% frequency in  
318 New Guinea<sup>41,42</sup>).

319

320 Since calling Denisovan-introgressed genes as differentially expressed depends on both the magnitude  
321 of the expression change and the introgressed allele's frequency, the likelihood cannot be easily predicted  
322 *a priori*. Therefore, we examined the distribution of introgressed allele frequencies in New Guinea for  
323 all DEGs in our data, and asked whether these differ between our three inter-island comparisons. If  
324 Denisovan introgression is contributing to expression differences between the three sampling sites, we  
325 expect that genes that are differentially expressed between the Korowai and the other two groups will  
326 have generally higher allele frequencies than genes that are DE between the Sumbanese and the

327 Mentawai. Indeed, we observe no difference in allelic frequencies for genes that are DE between both  
328 Sumba and West Papua, and Mentawai and West Papua (t-test  $p = 0.946$ ), but observe higher frequencies  
329 in DEG between Sumba and West Papua, or Mentawai and West Papua, than between Sumba and  
330 Mentawai ( $p = 0.035$  and  $0.034$ , respectively), suggesting that Denisovan introgression may impact the  
331 expression levels of some genes.

332

### 333 **Methylation changes are associated with changes in gene expression in a subset of genes**

334 To further explore the relationship between DNA methylation and gene expression, we asked how much  
335 of the variation we observe in gene expression levels can be attributed to variation in DNA methylation  
336 levels. We searched for regions of functional DNA methylation by identifying instances of significant  
337 negative correlation between gene expression levels and *cis*-promoter methylation. We identified 1,292  
338 probe clusters associated with 1,261 genes (9.72% of all genes under investigation) where expression  
339 level was predicted by nearby CpG methylation (Figure 3A, supplementary table 8). We compared the  
340 genes identified in this analysis with the DMPs and DEGs detected in the between-island comparisons,  
341 and find that 153 genes (10.94% of DEGs) in the comparison between Korowai and Sumba, 113 genes  
342 (11.11%) between Korowai and Mentawai, and 12 genes (3.83%) between Sumba and Mentawai have  
343 expression levels associated with significant methylation changes at nearby CpGs; these include genes  
344 like *SIGLEC7* (Figure 3B), which is involved in antigen presentation and natural killer (NK) cell-  
345 dependent tumor immunosurveillance<sup>43</sup>. *SIGLEC7* and other *SIGLEC* family genes are also potential  
346 immunotherapeutic targets against cancer<sup>44</sup>. These results confirm the relationship between DNA  
347 methylation and gene expression, and suggest a possible role for differential DNA methylation in shaping

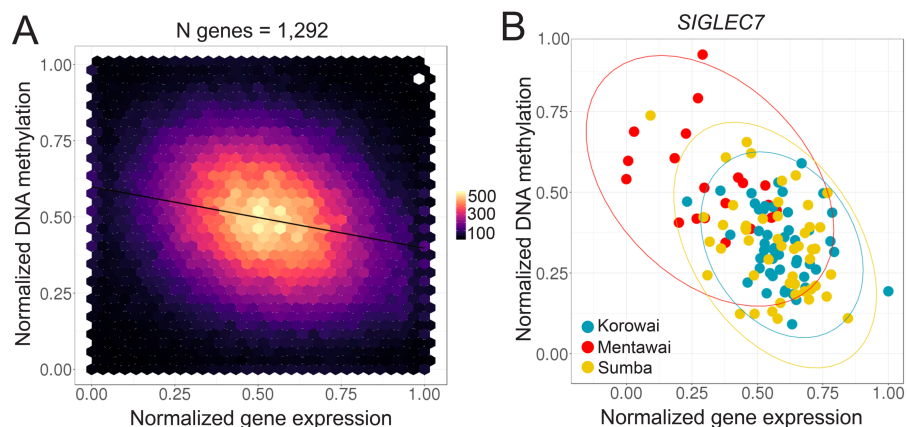

**Figure 3. Association between methylation and gene expression levels.** (A) Relationship between probe cluster DNA methylation and gene expression levels among the 1,292 probe clusters and associated genes identified by MethylMix. (B) Example of a single gene, *SIGLEC7*, which is both differentially expressed and differentially methylated between Sumbanese and the Korowai.

348 the patterns of differential gene expression between these populations. There are five enriched KEGG  
349 pathways, all broadly involved in immune interactions (Supplementary Table 9), including natural killer  
350 cell-mediated cytotoxicity.

351  
352 **Inter-island differences are primarily driven by a subset of villages**

353 While the three island populations differ substantially in terms of genetic composition, we have  
354 previously shown that there is a high degree of genetic similarity within islands<sup>13</sup>. Therefore, we may  
355 expect that intra-island differences in either DNA methylation or gene expression profiles, if they exist,  
356 are likely to reflect local environmental differences<sup>45</sup>. To test this hypothesis, we took advantage of the  
357 fact that we collected samples across multiple villages in both Sumba and Mentawai.

358  
359 PCA captured differences between villages at both the expression and methylation level. For instance,  
360 PC1 of the DNA methylation data captures varying degrees of separation at both the intra- and inter-  
361 island level. Neither the two Sumba villages, Wunga and Anakalang, or the two Mentawai villages,  
362 Taileleu and Madobag, are separated by the first PCs, confirming our previous observations of limited  
363 differentiation within islands. Between islands, however, PC1 separates the villages of Wunga and  
364 Taileleu (Tukey HSD,  $p = 0.001$ ; Supplementary Table 10), Wunga and Madobag ( $p = 0.012$ ), and  
365 Anakalang and Taileleu ( $p = 0.017$ ), but not Anakalang and Madobag ( $p = 0.101$ ). Of the two Mentawai  
366 villages, Taileleu is clearly separated from Korowai by PC1 ( $p = 1.9 \times 10^{-5}$ ), while Madobag is only  
367 weakly separated from Korowai ( $p = 0.021$ ); in Sumba, PC1 clearly separates Wunga and Korowai ( $p =$   
368  $0.003$ ), but separates Anakalang and Korowai only weakly ( $p = 0.033$ ). In the expression data, PC1  
369 separates Mentawai ( $p = 1.0 \times 10^{-7}$ ) and Sumba ( $p = 1.5 \times 10^{-6}$ ) from Korowai, and PC2 separates Sumba  
370 from Mentawai ( $p = 1.6 \times 10^{-4}$ ). When examining the villages, PC1 separates the Korowai village from  
371 the two Mentawai villages Madobag ( $p = 0.029$ ) and Taileleu ( $p < 1.0 \times 10^{-10}$ ) and the Sumba villages  
372 Wunga ( $p = 1.0 \times 10^{-7}$ ) and Anakalang ( $p = 4.0 \times 10^{-4}$ ). PC2 further separates Wunga ( $p = 0.0035$ ) and  
373 Anakalang ( $p = 0.039$ ) from Taileleu.

374  
375 We then repeated our differential expression and methylation analyses between villages. At a  $\log_2$  FC  
376 threshold of 0.5 and an FDR of 1%, we are able to recapitulate the main findings of our island-level  
377 analyses, although additional trends emerge (Figure 4, Supplementary Figure 7). Detectable differences  
378 between villages in the same island are small, with only 71 DMPs and 51 DEGs between the two  
379 Mentawai villages of Madobag and Taileleu, and 21 DMPs and 1 DEG, *IDO1* (a modulator of T-cell  
380 behavior and marker of immune activity<sup>46</sup>;  $p = 0.007$ ,  $\log_2$  FC = -1.48), between the Sumbanese villages



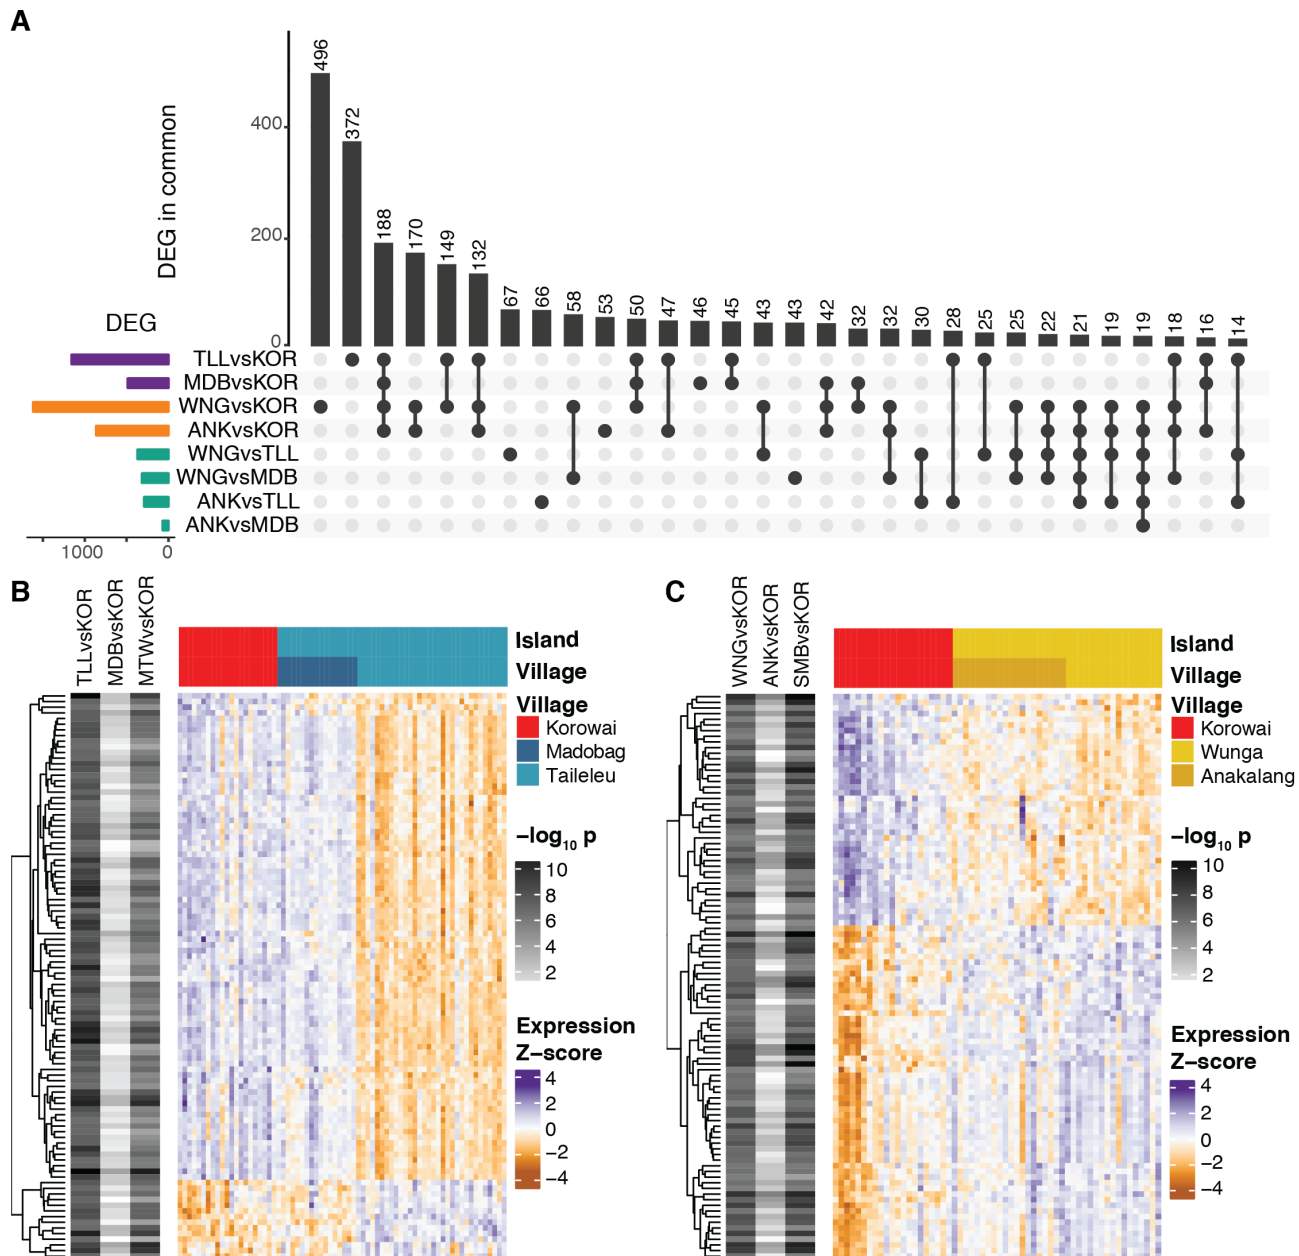

**Figure 4. Differential gene expression trends at the village level partially reflect inter-island trends.** (A) Sharing of village-level DEG signal across all possible inter-island contrasts. (B) Top 100 DEGs between Taileleu and the Korowai that are not DE between Madobag and the Korowai. (C) Top 100 DEGs between Wunga and the Korowai that are not DE between Anakalang and the Korowai.

381 of Wunga and Anakalang, echoing their limited separation in the PCA. Similarly, we find low numbers  
 382 of DEGs and DMPs across all comparisons involving Sumba and Mentawai (Figure 4), again  
 383 recapitulating the observations we made at the island level (Figure 2). Overall, there appears to be high  
 384 concordance between genes identified as DE at the island and village level (Supplementary Figure 8),  
 385 with a high degree of correlation between village- and island-level results, as expected (Supplementary

386 Table 11). However, when comparing villages within islands, we identified substantially more DMPs  
387 and DEGs between Taileleu and Korowai (9,631 and 1,157, respectively) than between Madobag and  
388 Korowai (7,282 and 486, respectively). Similarly, we identified more DMPs and DEGs between Wunga  
389 and Korowai (24,557 and 1,617, respectively) than between Anakalang and Korowai (18,663 and 863,  
390 respectively).

391

392 We thus focused on genes that exhibit discordant patterns between the villages in an island. DEGs  
393 between Taileleu and Korowai, but not between Madobag and Korowai (Figure 4B), tend to have similar  
394 expression profiles in Madobag and Korowai, whereas DEGs between Wunga and Korowai but not  
395 between Anakalang and Korowai (Figure 4C) seem to be expressed at an intermediate level in Anakalang.  
396 These differences are not correlated with known technical confounders such as differences in RNA  
397 quality or in variability within villages (Supplementary Figure 9). Indeed, their presence in both the DNA  
398 methylation and RNA sequencing results argues against sample processing artifacts. In order to confirm  
399 that these patterns were not driven by differences in sample size, we randomly subsampled each village  
400 to 10 individuals and repeated DEG testing  $10^3$  times. There are consistently more DEGs between Wunga  
401 and Korowai than Anakalang and Korowai (t-test  $p < 10^{-20}$ ) as well as between Taileleu and Korowai  
402 than between Madobag and Korowai ( $p < 10^{-20}$ ). In turn, this suggests that they may be driven by  
403 interactions between genetics and differences in the local environment at each sampling site, although a  
404 comparison of rainfall and mean monthly temperatures across all five sites did not support these factors  
405 as drivers (Supplementary Figure 10). On the whole, our results highlight the importance of detailed data  
406 collection and thorough sampling from regions spanning diverse genomic and environmental clines, if  
407 we are to elucidate gene-by-environment interactions.

408

409

## 410 Discussion

411 Although Island Southeast Asia accounts for nearly 6% of the world's population, and contains  
412 substantial ethnic and genetic diversity<sup>13</sup>, genomic characterisation of this region lags drastically behind  
413 other regions of the world. The first regional large-scale set of publicly available human whole genome  
414 sequences were published in 2019<sup>6</sup>; to our knowledge there is only one study of gene expression from  
415 the region, of patients with malaria from the northern tip of Sulawesi<sup>7</sup>. In contrast, our work represents  
416 the first characterization of gene expression and DNA methylation levels across self-reported healthy  
417 individuals from geographically and genetically distinct populations in Indonesia, and more broadly from  
418 Island Southeast Asia. We have surveyed three sites with genetically distinct populations, spanning the  
419 Asian/Papuan genetic cline that characterises human diversity in the region, and we also sampled  
420 multiple villages in two of the islands (Sumba and Mentawai). Our study design purposefully allows us  
421 to explore both genetic (primarily between islands) and environmental (both between and within island)  
422 contributions to expression and methylation differences, a result that is further highlighted in our inter-  
423 village analysis, where we observe some small-scale village-specific effects (Figure 4).

424

425 Indeed, while we find differentially expressed genes and differentially methylated CpGs in most location  
426 comparisons (Figure 2), the most numerous, reproducible and largest effect changes were found when  
427 comparing either the Sumbanese or Mentawai with the Korowai. Many of these results feature genes  
428 involved in immune function, suggesting a potentially adaptive response to local environmental  
429 pressures. For example, beyond consistent enrichment for immune-associated GO and KEGG terms, the  
430 top 20 strongest DEG signals between the Mentawai and the Korowai include genes involved in antigen  
431 presentation in both innate and adaptive immune cells (*MARCO* and *SIGLEC7*, respectively; *MARCO*  $p$   
432 =  $2.7 \times 10^{-14}$ ; *SIGLEC7*  $p$  =  $9.7 \times 10^{-14}$ ; these genes are also differentially expressed between Sumbanese  
433 and the Korowai (*MARCO*  $p$  =  $4.2 \times 10^{-10}$ ; *SIGLEC7*  $p$  =  $4.9 \times 10^{-12}$ ; supplementary figure 11).  
434 Polymorphisms within *MARCO*, which is expressed on the surface of macrophages, have been  
435 repeatedly shown to associate with susceptibility of infection by *Mycobacterium tuberculosis* and  
436 *Streptococcus pneumoniae* in multiple populations worldwide<sup>47-50</sup>; some of these variants have been  
437 subsequently shown to have a direct impact on antigen binding<sup>51</sup>. Our MethylMix analyses identify  
438 differences in *SIGLEC7* expression as being driven, at least in part, by methylation differences in its  
439 promoter region (Figure 4C).

440

441 In the absence of whole genome data from our samples, it is challenging to identify whether these signals  
442 are also associated with selective signals at the DNA level or driven entirely by environmental  
443 differences; neither of these genes has been identified in previous scans of Denisovan introgressions.  
444 However, both we and others have previously shown that introgressed Denisovan tracts on the island of  
445 New Guinea are enriched for immune genes<sup>6,52</sup>, similar to the contributions of Neandertals to non-African  
446 genomes<sup>53,54</sup>. Indeed, our data suggest that Denisovan introgression in New Guinea may be impacting  
447 gene expression levels in the Korowai. More broadly, immune challenges have exerted some of the  
448 strongest selective forces on humans throughout our species' history<sup>11</sup>; transmissible diseases endemic  
449 in Indonesia range from malaria (both *P. falciparum* and *P. vivax*)<sup>8</sup> to infections by multiple helminth  
450 species and other understudied tropical diseases<sup>2</sup>. Tuberculosis remains a major health concern in the  
451 region, with the World Health Organisation reporting nearly half a million new cases in 2017<sup>55</sup>.

452  
453 Others have sought to characterise the interplay between genetic and environmental contributions to  
454 either expression or methylation levels across limited geographic scales. A study of approximately 1,000  
455 individuals drawn from a founder population in Quebec demonstrated that gene-by-environment  
456 interactions – specifically, with air pollution levels – drastically impacted measurements of gene  
457 expression in blood, overpowering the effects of genetic relatedness<sup>45</sup>. Equivalent high-resolution  
458 Indonesian data are unavailable, and our attempts to associate differences in expression or methylation  
459 across small geographic scales by using WorldClim data were inconclusive. Unfortunately, it remains  
460 difficult to characterize granular levels of regional heterogeneity in disease burden and infection type,  
461 yet our results suggest pressures shaping immune response in Indonesia vary at the local level.

462  
463 A different study of DNA methylation across rainforest hunter-gatherer and farmer populations in Central  
464 Africa showed that methylation captures both population history and current lifestyle practices. However,  
465 these two factors impact non-overlapping sets of genes, with differences at immune genes associated  
466 with a group's present-day habitat as well as genomic signals of past positive selection<sup>45</sup>. We observe  
467 similar trends here; the Korowai occupy an ecological niche akin to that of African rainforest hunter-  
468 gatherers, whereas the inhabitants of Sumba and Mentawai are village-based agriculturalists. Sumba in  
469 particular is host to a network of traditional communities derived largely from pre-existing Papuans, who  
470 first arrived on the island ~50,000 years ago, and incoming Asian farming cultures, that reached the  
471 island ~4,000 years ago<sup>14</sup>. Today, Sumba retains a low population density and little contact between  
472 villages, as reflected in its extensive linguistic diversity<sup>56</sup>. This has resulted in small, isolated populations

473 of a few hundred to a few thousand individuals that can be identified genetically between villages roughly  
474 10 km apart<sup>14</sup>, making it a near unique study system for examining gene by environment interactions.

475

476 As we move further into the age of personalised and genomic medicine, understanding how genetics and  
477 other molecular phenotypes drive disease risk across diverse populations is of crucial importance to  
478 ensure benefits are equitably distributed. Already there has been a dramatic expansion of genomic-based  
479 tests that are being deployed to identify the risk of disease. However, these tests are largely built using  
480 European cohorts and have proven difficult to translate to non-European populations<sup>57-59</sup>. Even within  
481 homogeneous populations, environmental factors can have marked effects on gene expression  
482 measurements, and on the interpretability of genomic-based tests of disease risk<sup>60</sup>, highlighting a  
483 secondary risk of such biased European sampling: limiting not only the genomic diversity under study,  
484 but the environmental diversity as well, to general detriment. This study provides a valuable first step in  
485 the characterization of the processes shaping gene expression changes in Island Southeast Asia.

486

## 487 Acknowledgements

488 We especially thank all of our study participants and the Eijkman Institute field survey team, without  
489 whom this work would not have been possible. We thank Nicolas Brucato (Université de Toulouse Midi-  
490 Pyrénées), Christine Wells (University of Melbourne), Davide Vespasiani (University of Melbourne) and  
491 Isabella Apriyana (Australian National University) for valuable discussion. This study was supported by  
492 a National Science Foundation Grant SES 0725470 and a Singapore Ministry of Education Tier II Grant  
493 MOE2015-T2-1-127 to JSL, an NTU Presidential Postdoctoral Fellowship to GSJ, an NTU Complexity  
494 Institute Individual Fellowship to PK, and a Royal Society of New Zealand Marsden Grant 17-MAU-  
495 040 to MPC and IGR. HN was supported by an ASU Center for Evolution and Medicine postdoctoral  
496 fellowship and the Marcia and Frank Carlucci Charitable Foundation postdoctoral award from the  
497 Prevent Cancer Foundation. KSB was supported by a Melbourne Graduate Research Scholarship. MPC  
498 was supported by a University of Melbourne Miegunyah Distinguished Visiting Professor fellowship.

499

## 500 Declaration of Interests

501 The authors declare no competing interests.

502

## 503 Supplementary Materials

504 Supplementary materials include 11 tables and 11 figures:

505

506 Supplementary table 1: Sample metadata

507 Supplementary table 2: Sample sequencing information

508 Supplementary table 3: Summary of DEG/DMP/DMR testing at various thresholds

509 Supplementary table 4: GO enrichment testing results for DEGs

510 Supplementary table 5: KEGG enrichment testing results for DEGs

511 Supplementary table 6: GO enrichment testing results for DMPs

512 Supplementary table 7: KEGG enrichment testing results for DMPs

513 Supplementary table 8: List of significant MethylMix clusters

514 Supplementary table 9: KEGG enrichment testing for MethylMix-associated genes

515 Supplementary table 10: ANOVA on PCA and covariates

516 Supplementary table 11: Spearman correlation between village and island level across both DEG and

517 DMP tests

518

519 Supplementary figure 1: Clustering of the gene expression data before and after batch correction

520 Supplementary figure 2: Distribution of Spearman's pairwise correlation ( $\rho$ ) values across all levels

521 of the RNA-sequencing data

522 Supplementary figure 3: Clustering of the DNA methylation data before and after batch correction

523 Supplementary figure 4: Distribution of Spearman's pairwise correlation ( $\rho$ ) values across all levels

524 of the DNA methylation data.

525 Supplementary figure 5: Relationship between the  $\log_2(\text{FC})$  of probes and genes across island-level

526 comparisons.

527 Supplementary figure 6: Shared GO terms between Sumbanese and the Korowai and the Mentawai and

528 the Korowai

529 Supplementary figure 7: Sharing of village-level DMP signal across all possible inter-island contrasts.

530 Supplementary figure 8: Sharing of DE signals at the island and village levels

531 Supplementary figure 9: Distribution of coefficients of variation (CoV) across villages

532 Supplementary figure 10: Monthly climate fluctuations across the five main village sampling sites.

533 Supplementary figure 11:  $\log_2$  CPM values across all samples for (A) *MARCO* and (B) *SIGLEC7*.

534

## 535 References

- 536 1. Popejoy, A.B., and Fullerton, S.M. (2016). Genomics is failing on diversity. *Nature* 538, 161–164.
- 537 2. Horton, R. (2016). Offline: Indonesia—unravelling the mystery of a nation. *Lancet* 387, 830.
- 538 3. 1000 Genomes Project Consortium, Auton, A., Brooks, L.D., Durbin, R.M., Garrison, E.P., Kang,  
539 H.M., Korbel, J.O., Marchini, J.L., McCarthy, S., McVean, G.A., et al. (2015). A global reference for  
540 human genetic variation. *Nature* 526, 68–74.
- 541 4. Mallick, S., Li, H., Lipson, M., Mathieson, I., Gymrek, M., Racimo, F., Zhao, M., Chennagiri, N.,  
542 Nordenfelt, S., Tandon, A., et al. (2016). The Simons Genome Diversity Project: 300 genomes from  
543 142 diverse populations. *Nature* 538, 201–206.
- 544 5. Pagani, L., Lawson, D.J., Jagoda, E., Mörseburg, A., Eriksson, A., Mitt, M., Clemente, F.,  
545 Hudjashov, G., DeGiorgio, M., Saag, L., et al. (2016). Genomic analyses inform on migration events  
546 during the peopling of Eurasia. *Nature* 538, 238–242.
- 547 6. Jacobs, G.S., Hudjashov, G., Saag, L., Kusuma, P., Darusallam, C.C., Lawson, D.J., Mondal, M.,  
548 Pagani, L., Ricaut, F.-X., Stoneking, M., et al. (2019). Multiple Deeply Divergent Denisovan  
549 Ancestries in Papuans. *Cell* 177, 1010–1021.e32.
- 550 7. Yamagishi, J., Natori, A., Tolba, M.E.M., Mongan, A.E., Sugimoto, C., Katayama, T., Kawashima,  
551 S., Makalowski, W., Maeda, R., Eshita, Y., et al. (2014). Interactive transcriptome analysis of malaria  
552 patients and infecting *Plasmodium falciparum*. *Genome Res.* 24, 1433–1444.
- 553 8. Elyazar, I.R.F., Hay, S.I., and Baird, J.K. (2011). Malaria distribution, prevalence, drug resistance  
554 and control in Indonesia. *Adv. Parasitol.* 74, 41–175.
- 555 9. R. Tedjo Sasmono, Rama Dhenni, Benediktus Yohan, Paul Pronyk, Sri Rezeki Hadinegoro,  
556 Elizabeth Jane Soepardi, Chairin Nisa Ma'roef, Hindra I. Satari, Heather Menzies, William A. Hawley,  
557 et al. (2018). Zika Virus Seropositivity in 1–4-Year-Old Children, Indonesia, 2014. *Emerging*  
558 *Infectious Disease Journal* 24, 1740.
- 559 10. Suryanto, Plummer, V., and Boyle, M. (2017). Healthcare System in Indonesia. *Hosp. Top.* 95, 82–  
560 89.
- 561 11. Quintana-Murci, L. (2019). Human Immunology through the Lens of Evolutionary Genetics. *Cell*  
562 177, 184–199.
- 563 12. Cox, M.P., Karafet, T.M., Lansing, J.S., Sudoyo, H., and Hammer, M.F. (2010). Autosomal and X-  
564 linked single nucleotide polymorphisms reveal a steep Asian-Melanesian ancestry cline in eastern  
565 Indonesia and a sex bias in admixture rates. *Proc. Biol. Sci.* 277, 1589–1596.
- 566 13. Hudjashov, G., Karafet, T.M., Lawson, D.J., Downey, S., Savina, O., Sudoyo, H., Lansing, J.S.,  
567 Hammer, M.F., and Cox, M.P. (2017). Complex Patterns of Admixture across the Indonesian  
568 Archipelago. *Mol. Biol. Evol.* 34, 2439–2452.
- 569 14. Cox, M.P., Hudjashov, G., Sim, A., Savina, O., Karafet, T.M., Sudoyo, H., and Lansing, J.S.  
570 (2016). Small Traditional Human Communities Sustain Genomic Diversity over Microgeographic

- 571 Scales despite Linguistic Isolation. *Mol. Biol. Evol.* *33*, 2273–2284.
- 572 15. Babraham Bioinformatics - FastQC A Quality Control tool for High Throughput Sequence Data.  
573 <http://www.bioinformatics.babraham.ac.uk/projects/fastqc/>.
- 574 16. Bolger, A.M., Lohse, M., and Usadel, B. (2014). Trimmomatic: a flexible trimmer for Illumina  
575 sequence data. *Bioinformatics* *30*, 2114–2120.
- 576 17. Dobin, A., Davis, C.A., Schlesinger, F., Drenkow, J., Zaleski, C., Jha, S., Batut, P., Chaisson, M.,  
577 and Gingeras, T.R. (2013). STAR: ultrafast universal RNA-seq aligner. *Bioinformatics* *29*, 15–21.
- 578 18. Liao, Y., Smyth, G.K., and Shi, W. (2014). featureCounts: an efficient general purpose program for  
579 assigning sequence reads to genomic features. *Bioinformatics* *30*, 923–930.
- 580 19. R Core Team (2017). R: A language and environment for statistical computing (R Foundation for  
581 Statistical Computing, Vienna, Austria).
- 582 20. Robinson, M.D., and Oshlack, A. (2010). A scaling normalization method for differential  
583 expression analysis of RNA-seq data. *Genome Biol.* *11*, R25.
- 584 21. Law, C.W., Chen, Y., Shi, W., and Smyth, G.K. (2014). voom: precision weights unlock linear  
585 model analysis tools for RNA-seq read counts. *Genome Biol.* *15*, R29.
- 586 22. Ritchie, M.E., Phipson, B., Wu, D., Hu, Y., Law, C.W., Shi, W., and Smyth, G.K. (2015). limma  
587 powers differential expression analyses for RNA-sequencing and microarray studies. *Nucleic Acids*  
588 *Res.* *43*, e47.
- 589 23. Aguirre-Gamboa, R., de Klein, N., di Tommaso, J., Claringbould, A., Vosa, U., Zorro, M., Chu, X.,  
590 Bakker, O.O., Borek, Z., Ricano-Ponce, I., et al. (2019). Deconvolution of bulk blood eQTL effects  
591 into immune cell subpopulations.
- 592 24. Durinck, S., Spellman, P.T., Birney, E., and Huber, W. (2009). Mapping identifiers for the  
593 integration of genomic datasets with the R/Bioconductor package biomaRt. *Nat. Protoc.* *4*, 1184–1191.
- 594 25. Yu, G., Wang, L.-G., Han, Y., and He, Q.-Y. (2012). clusterProfiler: an R package for comparing  
595 biological themes among gene clusters. *OMICS* *16*, 284–287.
- 596 26. Carlson, M. Genome wide annotation for Human, primarily based on mapping using Entrez Gene  
597 identifiers. <https://doi.org/doi:10.18129/B9.bioc.org.Hs.org.db>.
- 598 27. Froehlich, H. GOSim. <https://doi.org/doi:10.18129/B9.bioc.GOSim>.
- 599 28. Fick, S.E., and Hijmans, R.J. (2017). WorldClim 2: new 1-km spatial resolution climate surfaces  
600 for global land areas. *International Journal of Climatology* *37*, 4302–4315.
- 601 29. Aryee, M.J., Jaffe, A.E., Corrada-Bravo, H., Ladd-Acosta, C., Feinberg, A.P., Hansen, K.D., and  
602 Irizarry, R.A. (2014). Minfi: a flexible and comprehensive Bioconductor package for the analysis of  
603 Infinium DNA methylation microarrays. *Bioinformatics* *30*, 1363–1369.
- 604 30. Maksimovic, J., Gordon, L., and Oshlack, A. (2012). SWAN: Subset-quantile within array  
605 normalization for illumina infinium HumanMethylation450 BeadChips. *Genome Biol.* *13*, R44.



- 606 31. Du, P., Kibbe, W.A., and Lin, S.M. (2008). lumi: a pipeline for processing Illumina microarray.  
607 *Bioinformatics* 24, 1547–1548.
- 608 32. Phipson, B., Maksimovic, J., and Oshlack, A. (2016). missMethyl: an R package for analyzing data  
609 from Illumina’s HumanMethylation450 platform. *Bioinformatics* 32, 286–288.
- 610 33. Geeleher, P., Hartnett, L., Egan, L.J., Golden, A., Raja Ali, R.A., and Seoighe, C. (2013). Gene-set  
611 analysis is severely biased when applied to genome-wide methylation data. *Bioinformatics* 29, 1851–  
612 1857.
- 613 34. Peters, T.J., Buckley, M.J., Statham, A.L., Pidsley, R., Samaras, K., V Lord, R., Clark, S.J., and  
614 Molloy, P.L. (2015). De novo identification of differentially methylated regions in the human genome.  
615 *Epigenetics Chromatin* 8, 6.
- 616 35. Gevaert, O. (2015). MethylMix: an R package for identifying DNA methylation-driven genes.  
617 *Bioinformatics* 31, 1839–1841.
- 618 36. Cedoz, P.-L., Prunello, M., Brennan, K., and Gevaert, O. (2018). MethylMix 2.0: an R package for  
619 identifying DNA methylation genes. *Bioinformatics* 34, 3044–3046.
- 620 37. Reich, D., Patterson, N., Kircher, M., Delfin, F., Nandineni, M.R., Pugach, I., Ko, A.M.-S., Ko, Y.-  
621 C., Jinam, T.A., Phipps, M.E., et al. (2011). Denisova admixture and the first modern human dispersals  
622 into Southeast Asia and Oceania. *Am. J. Hum. Genet.* 89, 516–528.
- 623 38. The Gene Ontology Consortium (2019). The Gene Ontology Resource: 20 years and still GOing  
624 strong. *Nucleic Acids Res.* 47, D330–D338.
- 625 39. Kanehisa, M., and Goto, S. (2000). KEGG: kyoto encyclopedia of genes and genomes. *Nucleic*  
626 *Acids Res.* 28, 27–30.
- 627 40. Paust, S., Gill, H.S., Wang, B.-Z., Flynn, M.P., Moseman, E.A., Senman, B., Szczepanik, M.,  
628 Telenti, A., Askenase, P.W., Compans, R.W., et al. (2010). Critical role for the chemokine receptor  
629 CXCR6 in NK cell-mediated antigen-specific memory of haptens and viruses. *Nat. Immunol.* 11,  
630 1127–1135.
- 631 41. Shenoy, A.R., Kim, B.-H., Choi, H.-P., Matsuzawa, T., Tiwari, S., and MacMicking, J.D. (2007).  
632 Emerging themes in IFN-gamma-induced macrophage immunity by the p47 and p65 GTPase families.  
633 *Immunobiology* 212, 771–784.
- 634 42. Pilla-Moffett, D., Barber, M.F., Taylor, G.A., and Coers, J. (2016). Interferon-Inducible GTPases in  
635 Host Resistance, Inflammation and Disease. *J. Mol. Biol.* 428, 3495–3513.
- 636 43. Jandus, C., Boligan, K.F., Chijioke, O., Liu, H., Dahlhaus, M., Démoulin, T., Schneider, C.,  
637 Wehrli, M., Hunger, R.E., Baerlocher, G.M., et al. (2014). Interactions between Siglec-7/9 receptors  
638 and ligands influence NK cell-dependent tumor immunosurveillance. *Journal of Clinical Investigation*  
639 124, 1810–1820.
- 640 44. Daly, J., Carlsten, M., and O’Dwyer, M. (2019). Sugar Free: Novel Immunotherapeutic Approaches  
641 Targeting Siglecs and Sialic Acids to Enhance Natural Killer Cell Cytotoxicity Against Cancer.  
642 *Frontiers in Immunology* 10,

- 643 45. Favé, M.-J., Lamaze, F.C., Soave, D., Hodgkinson, A., Gauvin, H., Bruat, V., Grenier, J.-C.,  
644 Gbeha, E., Skead, K., Smargiassi, A., et al. (2018). Gene-by-environment interactions in urban  
645 populations modulate risk phenotypes. *Nat. Commun.* *9*, 827.
- 646 46. Zhai, L., Ladomersky, E., Lenzen, A., Nguyen, B., Patel, R., Lauing, K.L., Wu, M., and  
647 Wainwright, D.A. (2018). IDO1 in cancer: a Gemini of immune checkpoints. *Cell. Mol. Immunol.* *15*,  
648 447.
- 649 47. Bowdish, D.M.E., Sakamoto, K., Lack, N.A., Hill, P.C., Sirugo, G., Newport, M.J., Gordon, S.,  
650 Hill, A.V.S., and Vannberg, F.O. (2013). Genetic variants of MARCO are associated with  
651 susceptibility to pulmonary tuberculosis in a Gambian population. *BMC Medical Genetics* *14*,.
- 652 48. Ma, M.-J., Wang, H.-B., Li, H., Yang, J.-H., Yan, Y., Xie, L.-P., Qi, Y.-C., Li, J.-L., Chen, M.-J.,  
653 Liu, W., et al. (2011). Genetic variants in MARCO are associated with the susceptibility to pulmonary  
654 tuberculosis in Chinese Han population. *PLoS One* *6*, e24069.
- 655 49. Dorrington, M.G., Roche, A.M., Chauvin, S.E., Tu, Z., Mossman, K.L., Weiser, J.N., and Bowdish,  
656 D.M.E. (2013). MARCO Is Required for TLR2- and Nod2-Mediated Responses to *Streptococcus*  
657 *pneumoniae* and Clearance of Pneumococcal Colonization in the Murine Nasopharynx. *The Journal of*  
658 *Immunology* *190*, 250–258.
- 659 50. Thuong, N.T.T., Tram, T.T.B., Dinh, T.D., Thai, P.V.K., Heemskerk, D., Bang, N.D., Chau,  
660 T.T.H., Russell, D.G., Thwaites, G.E., Hawn, T.R., et al. (2016). MARCO variants are associated with  
661 phagocytosis, pulmonary tuberculosis susceptibility and Beijing lineage. *Genes Immun.* *17*, 419–425.
- 662 51. Novakowski, K.E., Yap, N.V.L., Yin, C., Sakamoto, K., Heit, B., Golding, G.B., and Bowdish,  
663 D.M.E. (2018). Human-Specific Mutations and Positively Selected Sites in MARCO Confer Functional  
664 Changes. *Mol. Biol. Evol.* *35*, 440–450.
- 665 52. Gittelman, R.M., Schraiber, J.G., Vernot, B., Mikacenic, C., Wurfel, M.M., and Akey, J.M. (2016).  
666 Archaic Hominin Admixture Facilitated Adaptation to Out-of-Africa Environments. *Curr. Biol.* *26*,  
667 3375–3382.
- 668 53. Abi-Rached, L., Jobin, M.J., Kulkarni, S., McWhinnie, A., Dalva, K., Gragert, L., Babrzadeh, F.,  
669 Gharizadeh, B., Luo, M., Plummer, F.A., et al. (2011). The shaping of modern human immune systems  
670 by multiregional admixture with archaic humans. *Science* *334*, 89–94.
- 671 54. Dannemann, M., Andrés, A.M., and Kelso, J. (2016). Introgression of Neandertal- and Denisovan-  
672 like Haplotypes Contributes to Adaptive Variation in Human Toll-like Receptors. *Am. J. Hum. Genet.*  
673 *98*, 22–33.
- 674 55. WHO (2019). Tuberculosis country profiles. <https://www.who.int/tb/country/data/profiles/en/>  
675 (World Health Organization).
- 676 56. Lansing, J.S., Cox, M.P., Downey, S.S., Gabler, B.M., Hallmark, B., Karafet, T.M., Norquest, P.,  
677 Schoenfelder, J.W., Sudoyo, H., Watkins, J.C., et al. (2007). Coevolution of languages and genes on  
678 the island of Sumba, eastern Indonesia. *Proc. Natl. Acad. Sci. U. S. A.* *104*, 16022–16026.
- 679 57. Martin, A.R., Kanai, M., Kamatani, Y., Okada, Y., Neale, B.M., and Daly, M.J. (2019). Clinical use  
680 of current polygenic risk scores may exacerbate health disparities. *Nat. Genet.* *51*, 584–591.

- 681 58. Daar, A.S., and Singer, P.A. (2005). Pharmacogenetics and geographical ancestry: implications for  
682 drug development and global health. *Nat. Rev. Genet.* *6*, 241–246.
- 683 59. Martin, A.R., Gignoux, C.R., Walters, R.K., Wojcik, G.L., Neale, B.M., Gravel, S., Daly, M.J.,  
684 Bustamante, C.D., and Kenny, E.E. (2017). Human Demographic History Impacts Genetic Risk  
685 Prediction across Diverse Populations. *Am. J. Hum. Genet.* *100*, 635–649.
- 686 60. Mostafavi, H., Harpak, A., Conley, D., Pritchard, J.K., and Przeworski, M. Variable prediction  
687 accuracy of polygenic scores within an ancestry group.
- 688
